# Supplementary material
Source: PubMed Central journal article supplement (PMC9758591)
Supplement: mmc1.pdf [file mmc1.pdf]

## A Supplementary Tables and Figures

Table A1: Constraints on Pre-COVID VAR Mechanisms

| Explanatory  | Dependent |              |             |
|--------------|-----------|--------------|-------------|
|              | Ln Retail | Ln Farm Gate | Ln Breaking |
| Ln Retail    |           |              |             |
| L1           | 1         | .            | 0           |
| L2           | .         | .            | .           |
| Ln Farm Gate |           |              |             |
| L1           | .         | 1            | .           |
| L2           | .         | .            | .           |
| Ln Breaking  |           |              |             |
| L1           | 0         | .            | 1           |
| L2           | .         | .            | .           |

*Notes:* We improve on the efficiency of the VAR model by imposing the following constraints on the first-lag adjustment in equations (1)–(3). We constrain the coefficient on the own-price first-week lag to equal one for each price. Additionally, we constrain the coefficients on the cross-price coefficients so that prices adjust only to the closest link in the supply chain in the first-week following an innovation.

Table A2: Correlations among Product Attribute Indicators

|                | Brown | AA    | Medium | X-large | Cage-Free | Vegetarian-Fed | Organic | Omega-3 |
|----------------|-------|-------|--------|---------|-----------|----------------|---------|---------|
| Brown          | 1.00  |       |        |         |           |                |         |         |
| AA             | -0.29 | 1.00  |        |         |           |                |         |         |
| Medium         | -0.24 | 0.19  | 1.00   |         |           |                |         |         |
| X-large        | -0.05 | -0.06 | -0.13  | 1.00    |           |                |         |         |
| Cage-Free      | 0.31  | -0.21 | -0.16  | -0.11   | 1.00      |                |         |         |
| Vegetarian-Fed | 0.24  | -0.10 | -0.08  | 0.00    | -0.14     | 1.00           |         |         |
| Organic        | 0.42  | -0.17 | -0.13  | -0.02   | -0.24     | -0.12          | 1.00    |         |
| Omega-3        | -0.26 | -0.19 | -0.15  | 0.16    | -0.27     | -0.13          | -0.22   | 1       |

*Notes:* This table reports correlations among the product attribute indicators used in the differentiated products analysis.

Figure A1: Test for VAR Parameter Stability

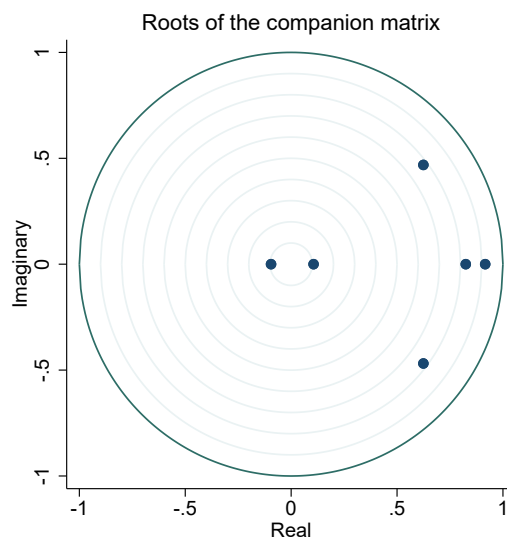

*Notes:* This figure depicts the results for parameter stability and covariance stationarity ([Hamilton, 1994](#); [Lütkepohl, 2005](#)). Estimated equations (1)–(3) satisfy the condition that the modulus of each eigenvalue in the companion matrix is less than one, ensuring that inference using orthogonalized impulse-response functions is valid.

Figure A2: Implied versus Actual Responses to Retail & Breaker Price Shocks

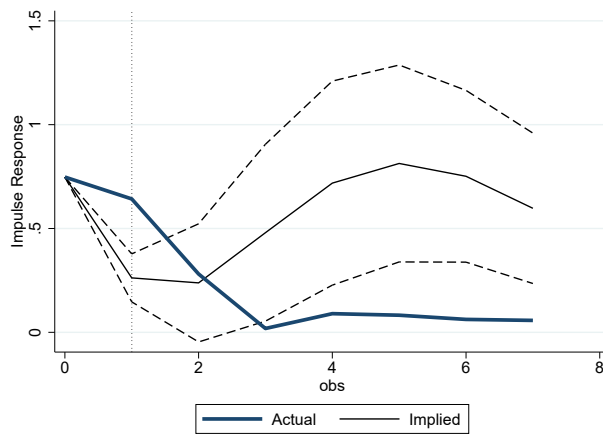

(a) Retail Response

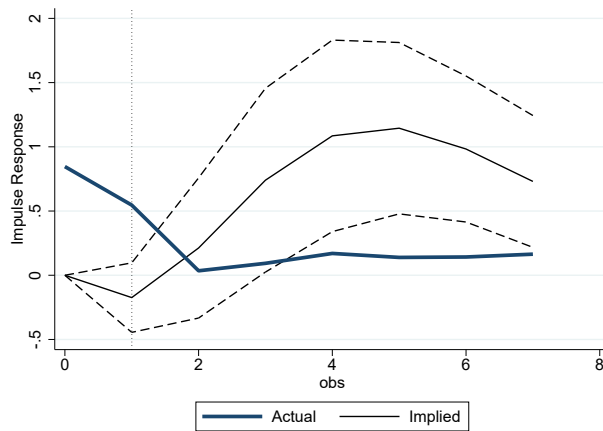

(b) Farm-Gate Response

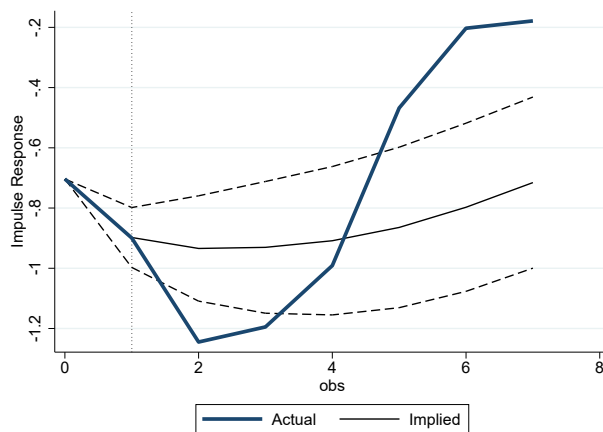

(c) Breaker Response

*Notes:* This figure plots the evolution of responses of retail prices, farm-gate table egg prices, and breaking stock prices implied by the orthogonal impulse response estimates associated with the retail price shock (for retail and farm-gate table egg prices) and the breaker price shock (for breaker prices).
